# Supplementary material
Source: PubMed Central journal article supplement (PMC3883986)
Supplement: NIHMS490515-supplement-supplement_1.pdf [file NIHMS490515-supplement-supplement_1.pdf]

Supplemental Table 1. Percent of the phenotypic variation attributable to BMI variants and additive genetic effects other than BMI variants

|                            | $h^2$ (%) | $SE_{h^2} \times 100$ | GRS (%) | Total additive genetic effects (%) |
|----------------------------|-----------|-----------------------|---------|------------------------------------|
| BMI during infancy         |           |                       |         |                                    |
| 0 months                   | 47.34     | 10.66                 | 0.0002  | 47.34                              |
| 1 month                    | 43.92     | 12.30                 | 0.02    | 43.95                              |
| 3 months                   | 54.52     | 11.01                 | 0.24    | 54.75                              |
| 6 months                   | 57.55     | 10.53                 | 1.46    | 59.00                              |
| 9 months                   | 76.14     | 10.47                 | 1.34    | 77.48                              |
| 12 months                  | 65.10     | 10.20                 | 0.24    | 65.34                              |
| 18 months                  | 55.40     | 9.83                  | 0.38    | 55.77                              |
| 28 months                  | 55.56     | 8.30                  | 0.56    | 56.12                              |
| BMI during childhood       |           |                       |         |                                    |
| 4 years                    | 67.02     | 9.02                  | 1.02    | 68.03                              |
| 7 years                    | 71.15     | 8.35                  | 1.52    | 72.66                              |
| BMI during adolescence     |           |                       |         |                                    |
| 11 years                   | 76.46     | 8.01                  | 1.62    | 78.08                              |
| 15 years                   | 72.69     | 7.84                  | 1.96    | 74.65                              |
| BMI during early adulthood |           |                       |         |                                    |
| 19 years                   | 70.00     | 8.52                  | 0.26    | 70.26                              |
| 23 years                   | 66.06     | 8.74                  | 1.23    | 67.29                              |
| 30 years                   | 56.71     | 8.17                  | 3.12    | 59.83                              |
| BMI during mid-adulthood   |           |                       |         |                                    |
| 40 years                   | 40.43     | 9.19                  | 3.32    | 43.74                              |
